# Supplementary material for: ACEIC: a comprehensive anthropogenic chlorine emission inventory for China
Source: Copernicus journal article supplement (doi:10.5194/egusphere-2023-1448), 2023-07-21
Supplement: Supplementary file 1 [file egusphere-2023-1448-supplement.pdf]

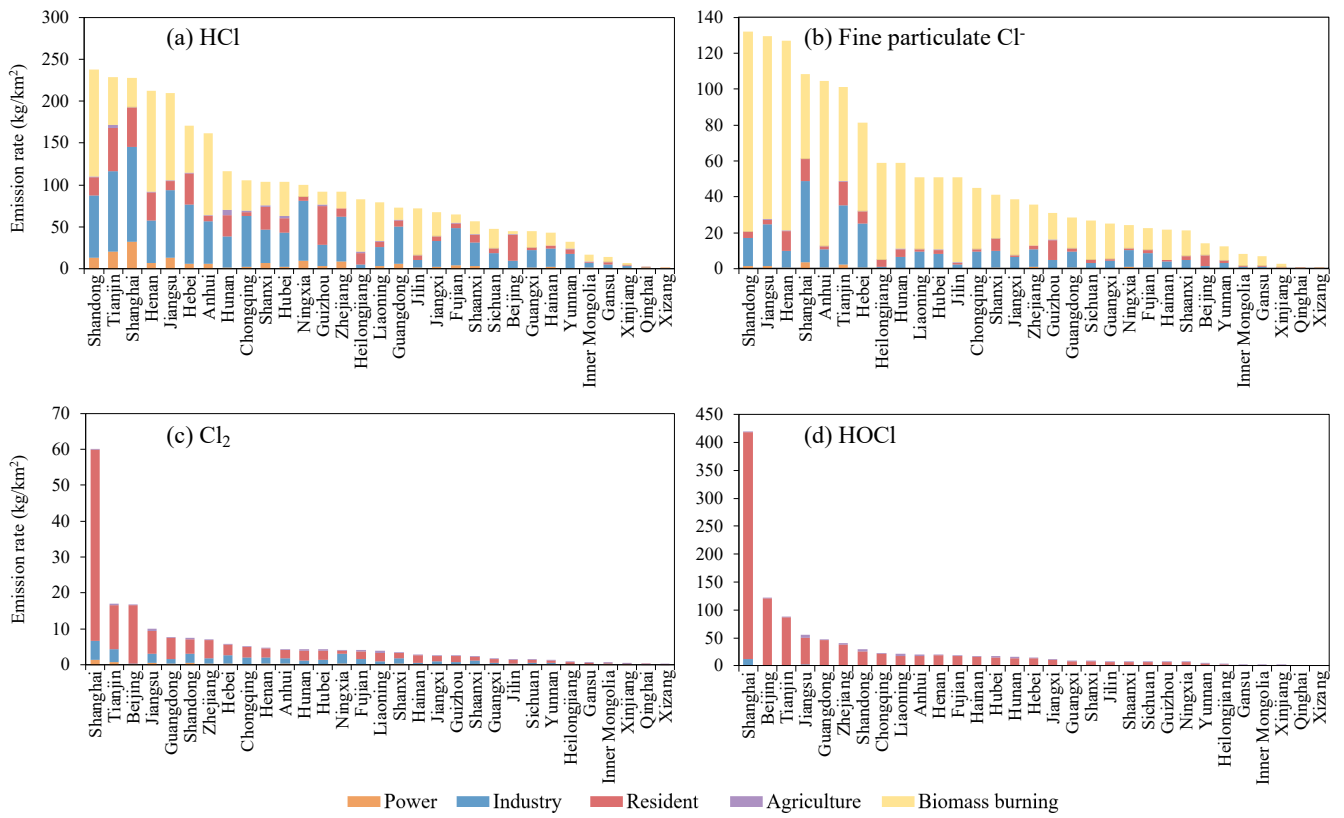

Figure S1 Per-unit-area emissions of HCl (a), fine particulate Cl<sup>-</sup> (b), Cl<sub>2</sub> (c) and HOCl (d) by province.

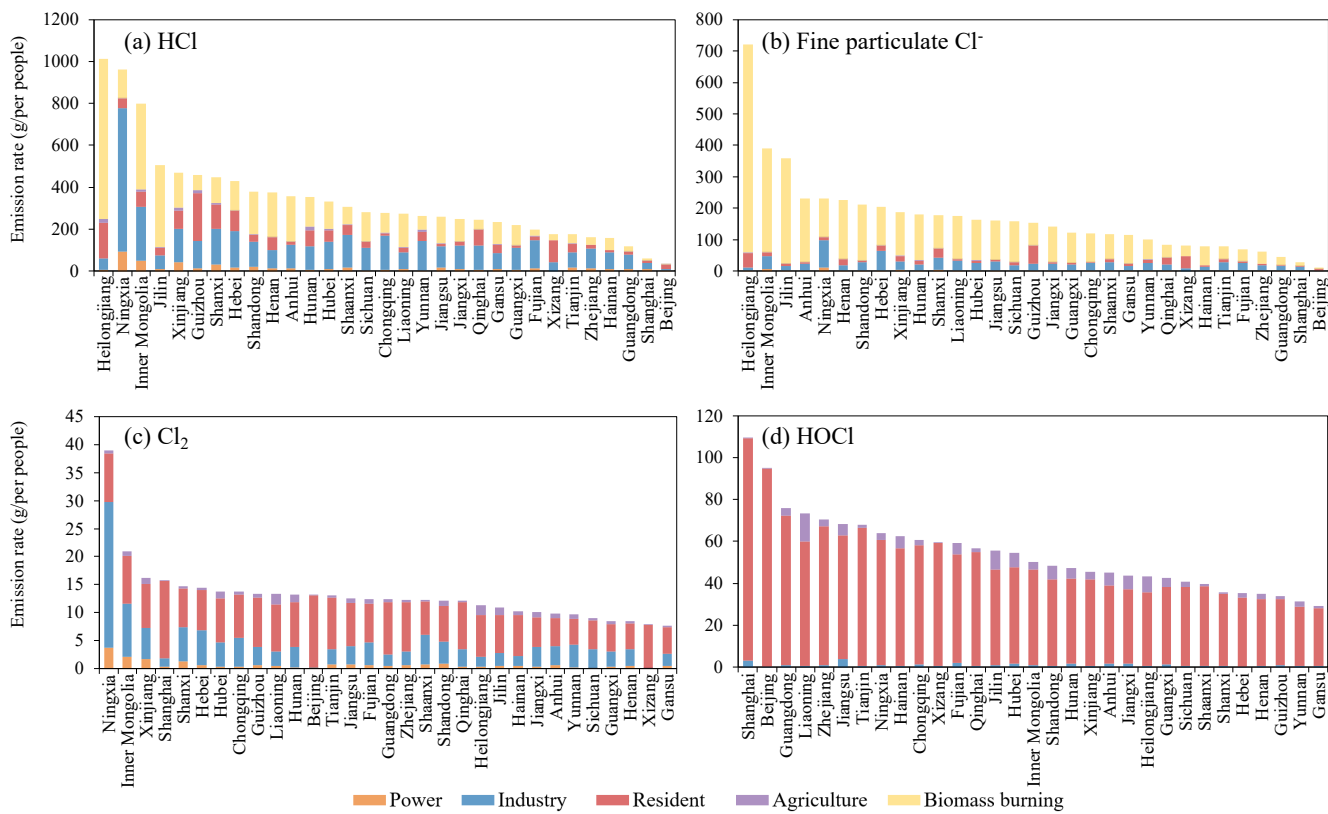

Figure S2 Per-capita emissions of HCl (a), fine particulate Cl<sup>-</sup> (b), Cl<sub>2</sub> (c) and HOCl (d) by province.

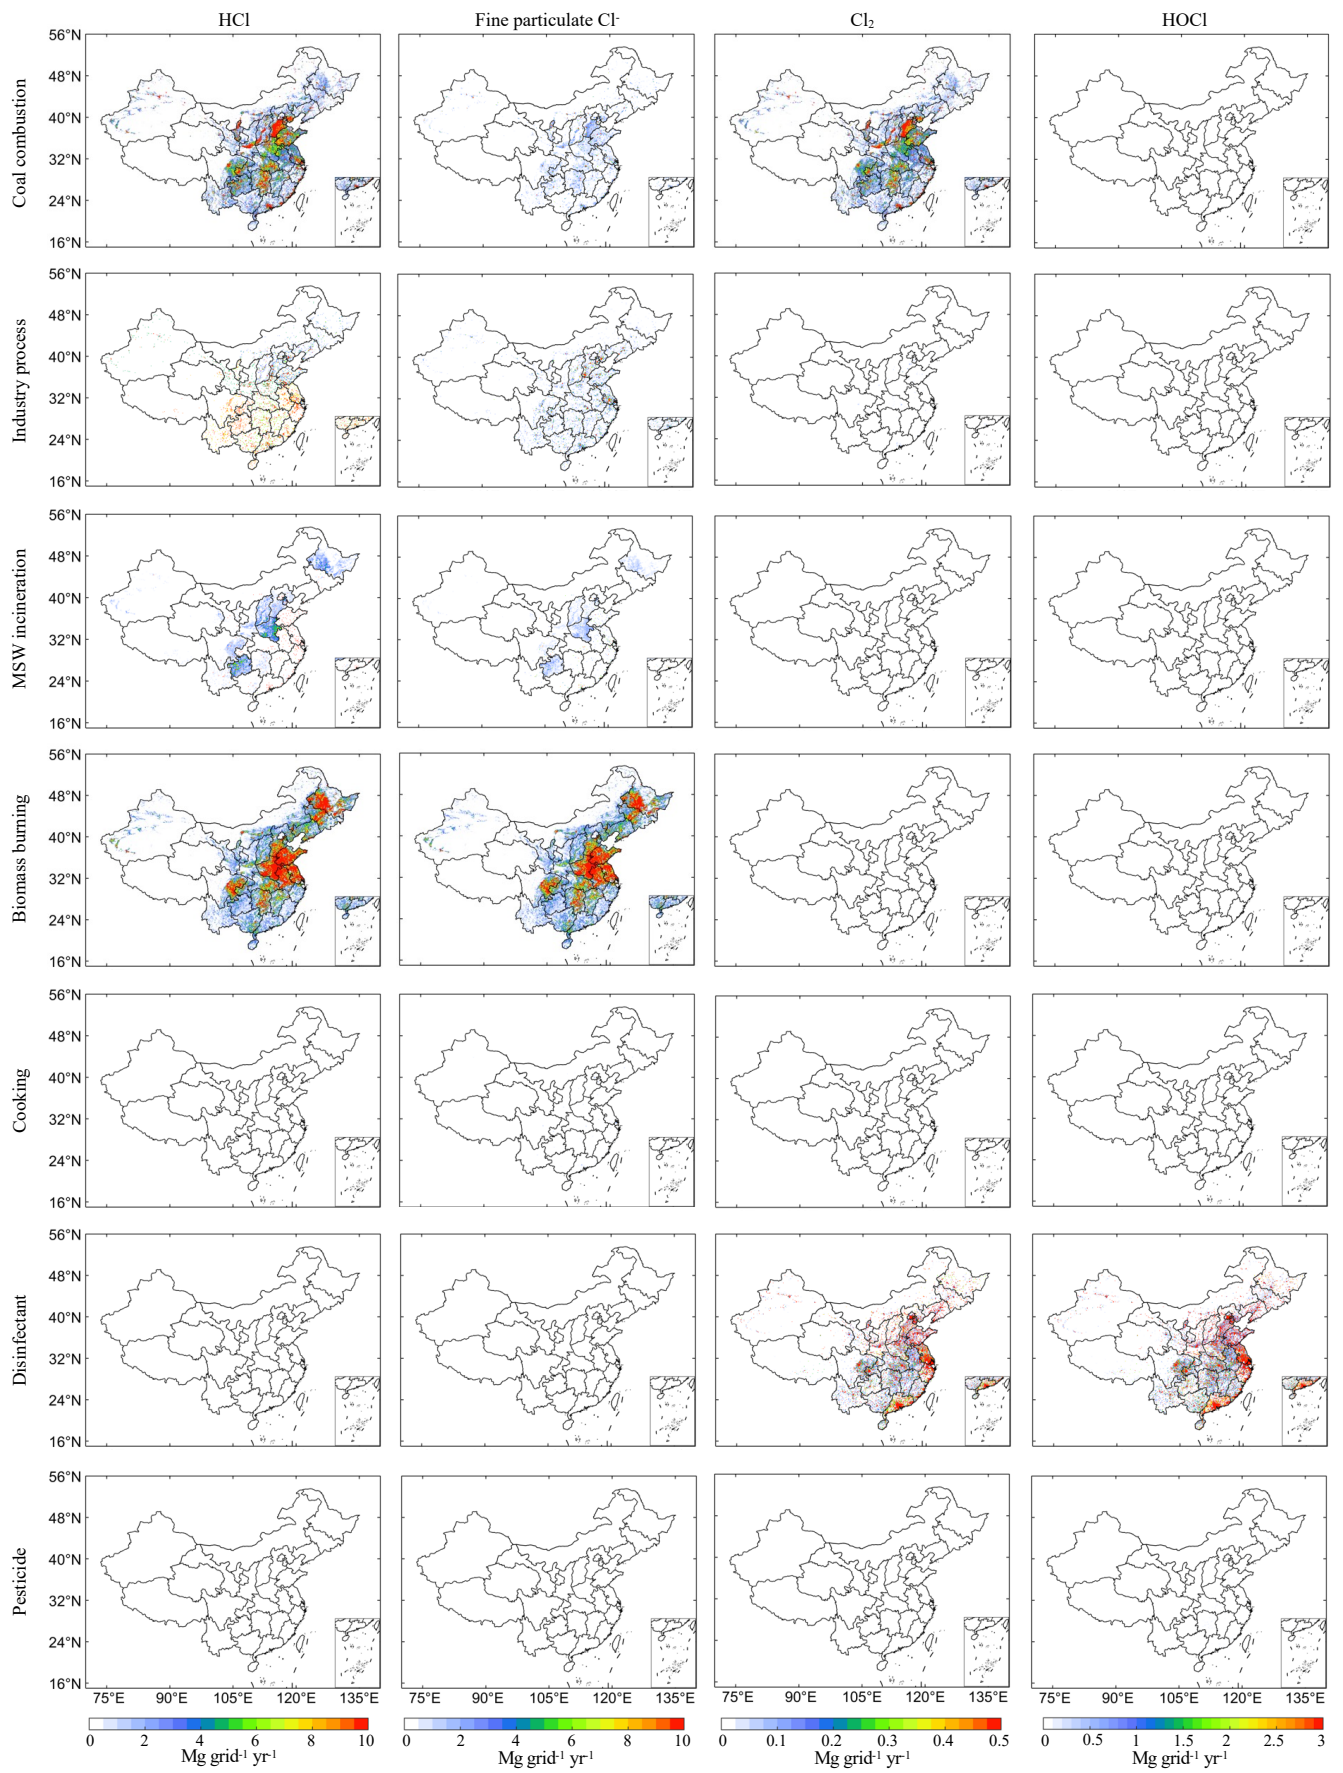

Figure S3 Spatial distribution of anthropogenic chlorine emissions by source category.

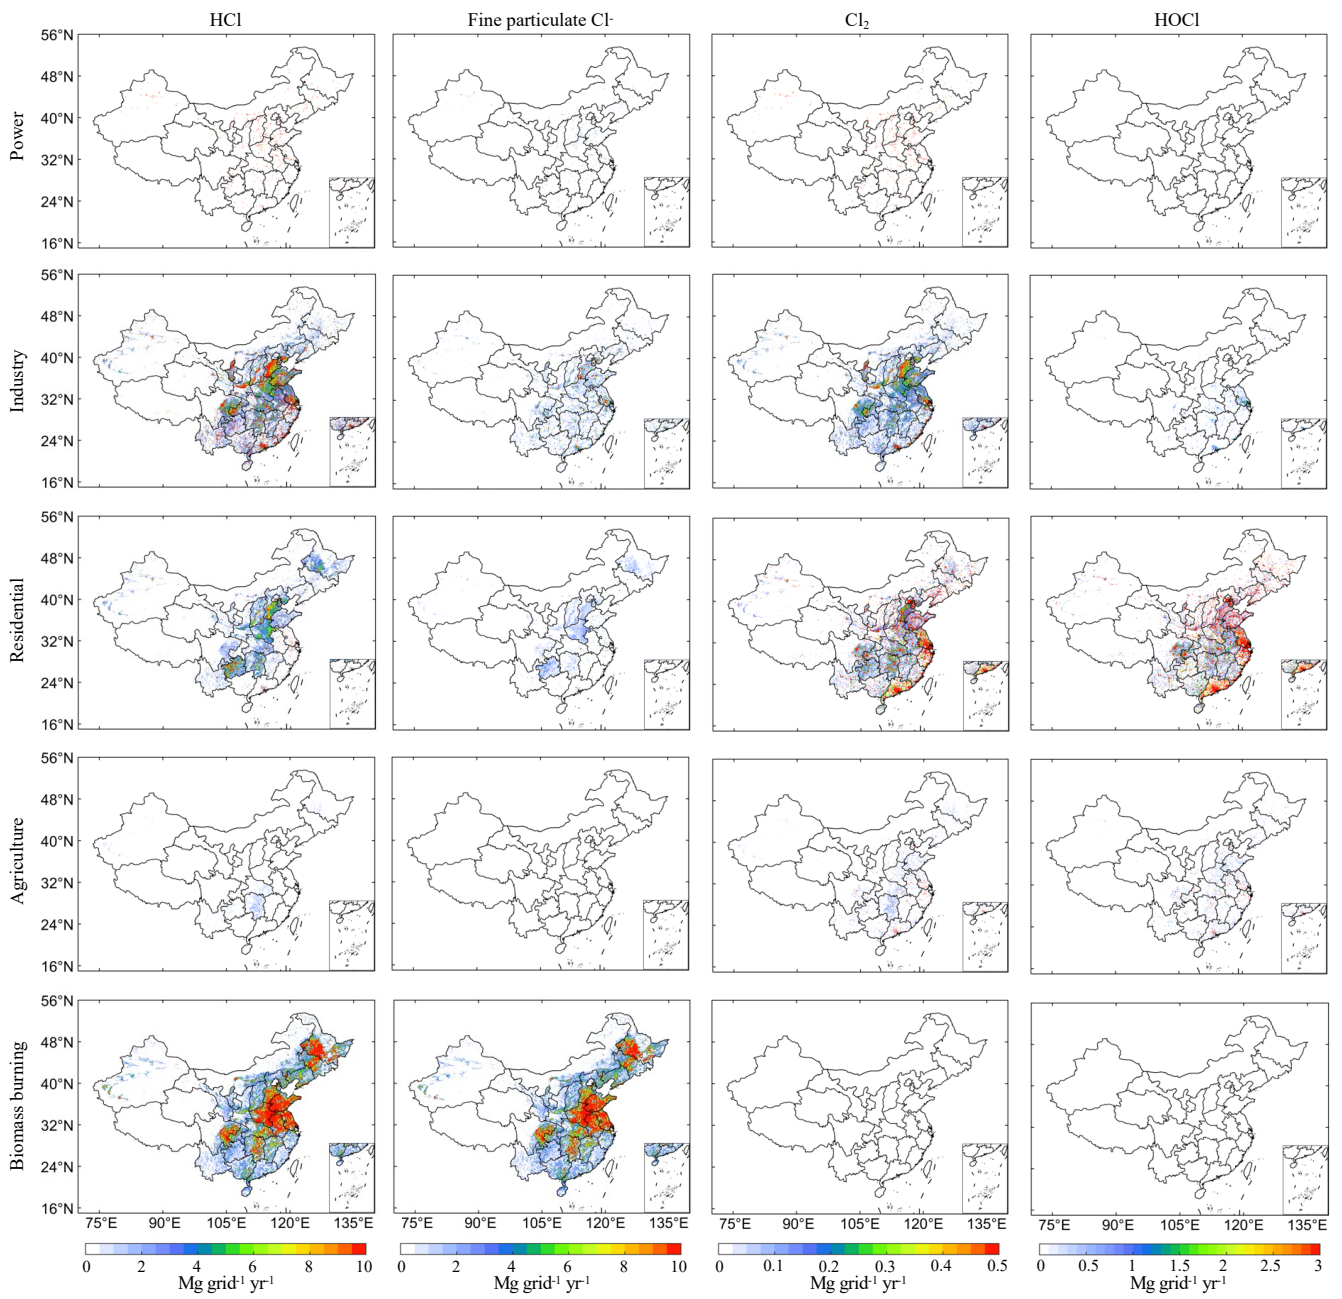

Figure S4 Spatial distribution of anthropogenic chlorine emissions by economic sector.

Table S1 Sources of activity data.

| Source category       | Sub-category                  | Activity level data                       | Source                                                                                                                                                             |
|-----------------------|-------------------------------|-------------------------------------------|--------------------------------------------------------------------------------------------------------------------------------------------------------------------|
| Coal combustion       | Power                         | Coal consumption of power plant           | China Energy Statistical Yearbook 2019 (National Bureau of Statistics, 2019a)                                                                                      |
|                       |                               | Coal consumption for heat supply          |                                                                                                                                                                    |
|                       |                               | Coal consumption of industry              |                                                                                                                                                                    |
|                       |                               | Coal consumption of construction industry |                                                                                                                                                                    |
|                       | Residential                   | Coal consumption of residents             |                                                                                                                                                                    |
|                       |                               | Coal consumption of traffic               |                                                                                                                                                                    |
|                       |                               | Coal consumption of business              |                                                                                                                                                                    |
|                       |                               | Coal consumption of other                 |                                                                                                                                                                    |
|                       | Agriculture                   | Coal consumption of agriculture           |                                                                                                                                                                    |
|                       | Industrial production process | Cement production                         |                                                                                                                                                                    |
| Iron production       |                               | Production of iron                        |                                                                                                                                                                    |
| Steel production      |                               | Production of steel                       |                                                                                                                                                                    |
| Flat glass production |                               | Production of flat glass                  |                                                                                                                                                                    |
| HCl production        |                               | Production of hydrochloric acid           |                                                                                                                                                                    |
| Waste incineration    | Incineration station          | Waste incineration amount                 | National Bureau of Statistics<br>( <a href="https://m.sohu.com/a/335035620_775892/?pvid=000115_3w_a">https://m.sohu.com/a/335035620_775892/?pvid=000115_3w_a</a> ) |
|                       | Open burning                  | Population                                |                                                                                                                                                                    |
|                       |                               | Waste disposal rate                       |                                                                                                                                                                    |
| Biomass burning       | Household burning-            | Rural population                          | China Urban and Rural Construction Statistical Yearbook 2019 (National Bureau of Statistics, 2019c)                                                                |
|                       | Firewood                      | Rural household size                      |                                                                                                                                                                    |
|                       | Household burning-Crop        | Crop yield                                |                                                                                                                                                                    |
|                       | Open burning                  | Crop yield                                |                                                                                                                                                                    |
| Cooking               | Household                     | Population                                | China Population and Employment Statistical Yearbook 2019 (National Bureau of Statistics, 2019e)                                                                   |
|                       | Restaurant                    | Household size                            |                                                                                                                                                                    |
|                       |                               | Number of restaurants                     |                                                                                                                                                                    |
|                       | Canteen-School                | Number of students                        |                                                                                                                                                                    |

|                            |                       |                                                          |  |                                                                                                     |
|----------------------------|-----------------------|----------------------------------------------------------|--|-----------------------------------------------------------------------------------------------------|
|                            |                       | Number of teaching staff                                 |  |                                                                                                     |
|                            | Canteen-Unit          | Number of public institutions<br>Number of organizations |  | China Statistical Yearbook 2019 (National Bureau of Statistics, 2019g)                              |
| Cooling tower              | Cooling tower         | Industrial water consumption                             |  | China Environmental Statistics Yearbook 2019 (National Bureau of Statistics, 2019h)                 |
| Water treatment            | Water treatment       | Tap water supply                                         |  | China Urban and Rural Construction Statistical Yearbook 2019 (National Bureau of Statistics, 2019c) |
| Waste water treatment      | Medical sewage        | Number of hospital beds                                  |  | China Health Statistics Yearbook 2019 (National Bureau of Statistics, 2019i)                        |
|                            | Domestic sewage       | Sewage treatment capacity                                |  | China Urban and Rural Construction Statistical Yearbook 2019 (National Bureau of Statistics, 2019c) |
| Swimming pool              | Public Swimming pool  | Number of swimming pools                                 |  | General Administration of Sport of China                                                            |
|                            | Private swimming pool | Per capita income of residents                           |  | China Statistical Yearbook 2019 (National Bureau of Statistics, 2019g)                              |
| Tap water use              | Car washing           | Number of car wash shops                                 |  | Gaode' POI (point of interest) data                                                                 |
|                            | Lawn watering         | Afforested area                                          |  | China Urban and Rural Construction Statistical Yearbook 2019 (National Bureau of Statistics, 2019c) |
|                            | Road watering         | Road area                                                |  |                                                                                                     |
|                            | Water leakage         | Leakage water volume                                     |  |                                                                                                     |
| Hospital                   |                       | Number of hospitals                                      |  | China Health Statistics Yearbook 2019 (National Bureau of Statistics, 2019i)                        |
|                            |                       | Total health expenditure in 2018                         |  | China Health Statistics Yearbook 2008 (National Bureau of Statistics, 2008)                         |
|                            |                       | Total health expenditure in 2007                         |  |                                                                                                     |
| Environmental disinfection |                       | Number on hand at the end of the pig year                |  |                                                                                                     |
|                            | Breeding              | Number of poultry on hand at the end of the year         |  | China Rural Statistical Yearbook 2019 (National Bureau of Statistics, 2019e)                        |
|                            | Toilet                | Aquaculture area                                         |  | China Urban and Rural Construction Statistical Yearbook 2019 (National Bureau of Statistics, 2019c) |
| Pesticide                  | Insecticide           | Pesticide usage                                          |  | China Rural Statistical Yearbook 2019 (National Bureau of Statistics, 2019e)                        |
|                            | Herbicide             | Pesticide usage                                          |  |                                                                                                     |

Table S2 Emission factor of HCl from different sources

| Source category               | Sub-category                | Emission factor | Reference                            |
|-------------------------------|-----------------------------|-----------------|--------------------------------------|
| Industrial production process | Cement production (g/t)     | 16.30           | Yi et al. (2020)                     |
|                               | Iron production (g/t)       | 0.60            | Yi et al. (2020)                     |
|                               | Steel production (g/t)      | 0.80            | Yi et al. (2020)                     |
|                               | HCl production (g/kg)       | 0.08            | Yi et al. (2020)                     |
|                               | Flat glass production (g/t) | 12.50           | Ministry. (2011); Wang et al. (2014) |
| Waste incineration            | Open burning (g/kg)         | 3.58            | Fu et al. (2018)                     |
| Biomass burning               | Rice straw (g/kg)           | 0.44            | Yi et al. (2021)                     |
|                               | Wheat straw (g/kg)          | 0.60            | Yi et al. (2021)                     |
|                               | Other crop straw (g/kg)     | 0.52            | Yi et al. (2021)                     |
|                               | Firewood (g/kg)             | 0.06            | Yi et al. (2021)                     |

Table S3 Emission factors of Cl<sub>2</sub> and HOCl.

| Sub-category                | Thi-category          | Chlorine dose (mg/L) | Free chlorine (mg/L) | Cl volatilization rate | Cl <sub>2</sub> emission factor (mg/L) | HOCl emission factor (mg/L) | Reference                               |
|-----------------------------|-----------------------|----------------------|----------------------|------------------------|----------------------------------------|-----------------------------|-----------------------------------------|
| Flat glass production (g/t) |                       | -                    | -                    | -                      | 0.615                                  | -                           | Ministry. (2011); Wang et al. (2014)    |
| Cooling tower               |                       | 1                    | 0                    | 1                      | 0.84                                   | 0.11                        | Wong et al. (2017); Wang et al. (2002)  |
| Water treatment             |                       | 2.2                  | 0.86                 | 0.2                    | 0.22                                   | 0.03                        | Li et al. (2020); Wong et al. (2017)    |
| Waste water treatment       | Medical sewage        | 10                   | 0.5                  | 0.2                    | 1.60                                   | 0.21                        | Li et al. (2020); Wong et al. (2017)    |
|                             | Domestic sewage       | 2.8                  | 0                    | 0.2                    | 0.47                                   | 0.06                        | Li et al. (2020); Wong et al. (2017)    |
| Swimming pool               | Indoor swimming pool  | 1.8                  | 0                    | 0.2                    | 0.30                                   | 0.04                        | Wong et al. (2017); (Wang et al., 2002) |
|                             | Outdoor swimming pool | 1.125                | 0                    | 0.2                    | 0.19                                   | 0.02                        | Wong et al. (2017); (Wang et al., 2002) |
| Tap water use               | Car washing           | 0.86                 | 0                    | 1                      | 0.72                                   | 0.09                        | Li et al. (2020); Wong et al. (2017)    |
|                             | Lawn watering         | 0.86                 | 0                    | 1                      | 0.72                                   | 0.09                        | Li et al. (2020); Wong et al. (2017)    |
|                             | Road watering         | 0.86                 | 0                    | 1                      | 0.72                                   | 0.09                        | Li et al. (2020); Wong et al. (2017)    |
|                             | Water leakage         | 0.86                 | 0                    | 0.1                    | 0.07                                   | 0.01                        | Li et al. (2020); Wong et al. (2017)    |



Table S4 Emission factor of fine particulate Cl<sup>-</sup> from different sources

| Source category               | Sub-category          | Emission factor (g/kg) | Reference                | Cl <sup>-</sup> in PM <sub>2.5</sub> (%) | Reference                |
|-------------------------------|-----------------------|------------------------|--------------------------|------------------------------------------|--------------------------|
| Industrial production process | Cement production     | 0.5                    | Yi et al. (2020)         | 0.73                                     | Yi et al. (2020)         |
|                               | Iron production       | 0.17                   | Yi et al. (2020)         | 3.54                                     | Yi et al. (2020)         |
|                               | Steel production      | 0.2                    | Yi et al. (2020)         | 3.54                                     | Yi et al. (2020)         |
|                               | Flat glass production | 0.546                  | Pan et al. (2015)        | 2                                        | Wen et al. (2019)        |
| Waste incineration            | Open burning          | 9.8                    | Wiedinmyer et al. (2014) | 13.8                                     | Wiedinmyer et al. (2014) |

Table S5 Straw-to-product ratio, dry matter fraction, and combustion efficiency for biomass burning (Zhou et al., 2017).

| Crop type  | Straw-to-product ratio (R) | dry matter fraction (D) | combustion efficiency (C) |
|------------|----------------------------|-------------------------|---------------------------|
| Rice       | 1.323                      | 0.89                    | 0.93                      |
| Wheat      | 1.3                        | 0.89                    | 0.83                      |
| Corn       | 1.269                      | 0.87                    | 0.92                      |
| Bean       | 1.6                        | 0.91                    | 0.68                      |
| Potato     | 0.5                        | 0.45                    | 0.68                      |
| Cotton     | 3                          | 0.83                    | 0.9                       |
| Peanut     | 1.5                        | 0.94                    | 0.82                      |
| Rapeseed   | 1.5                        | 0.83                    | 0.9                       |
| Sesame     | 2.2                        | 0.83                    | 0.9                       |
| Hemp       | 1.7                        | 0.83                    | 0.9                       |
| Sugar cane | 0.3                        | 0.45                    | 0.68                      |
| Sugar beet | 0.1                        | 0.45                    | 0.9                       |

Table S6 Percentage of biomass domestic burning and open burning by province (Zhou et al., 2017).

| Province       | Percentage of domestic burning | Percentage of open burning |
|----------------|--------------------------------|----------------------------|
| Beijing        | 0.0923                         | 0.096                      |
| Tianjin        | 0.42                           | 0.165                      |
| Hebei          | 0.35                           | 0.165                      |
| Shanxi         | 0.45                           | 0.2                        |
| Inner Mongolia | 0.338                          | 0.246                      |
| Liaoning       | 0.396                          | 0.2                        |
| Jilin          | 0.3                            | 0.259                      |
| Heilongjiang   | 0.26                           | 0.5                        |
| Shanghai       | 0.2                            | 0.148                      |
| Jiangsu        | 0.3                            | 0.225                      |
| Zhejiang       | 0.3                            | 0.3                        |
| Anhui          | 0.29                           | 0.319                      |
| Fujian         | 0.3                            | 0.188                      |
| Jiangxi        | 0.23                           | 0.2                        |
| Shandong       | 0.45                           | 0.2                        |
| Henan          | 0.3                            | 0.2                        |
| Hubei          | 0.283                          | 0.197                      |
| Hunan          | 0.4                            | 0.2                        |
| Guangdong      | 0.17                           | 0.1976                     |
| Guangxi        | 0.2226                         | 0.2273                     |
| Hainan         | 0.45                           | 0.2                        |
| Chongqing      | 0.4922                         | 0.1211                     |
| Sichuan        | 0.45                           | 0.2                        |
| Guizhou        | 0.35                           | 0.2                        |
| Yunnan         | 0.2                            | 0.1                        |
| Xizang         | 0.338                          | 0.148                      |
| Shaanxi        | 0.338                          | 0.159                      |
| Gansu          | 0.338                          | 0.159                      |
| Qinghai        | 0.338                          | 0.159                      |
| Ningxia        | 0.338                          | 0.159                      |
| Xinjiang       | 0.143                          | 0.137                      |

Table S7 Emission factors for biomass burning (Yi et al., 2021).

| Crop type      | PM <sub>2.5</sub> Emission Factors (g/kg) |
|----------------|-------------------------------------------|
| Rice straw     | 0.4635                                    |
| Wheat straw    | 0.5271                                    |
| Corn straw     | 0.4146                                    |
| Bean straw     | 0.233                                     |
| Rapeseed straw | 0.246                                     |
| Other straw    | 0.37684                                   |
| Firewood       | 0.16                                      |

Table S8 Parameters of emission factors for cooking.

| Source category | Number of heats <sup>a</sup> | Smoke discharge (m <sup>3</sup> /h) <sup>b</sup> | Cooking time (h/d) <sup>b</sup> | Day (d) <sup>b</sup> | PM <sub>2.5</sub> Emission Factors (mg/m <sup>3</sup> ) <sup>b</sup> | Removal rate (%) <sup>b</sup> | Percentage of domestic burning (%) <sup>c</sup> |       |
|-----------------|------------------------------|--------------------------------------------------|---------------------------------|----------------------|----------------------------------------------------------------------|-------------------------------|-------------------------------------------------|-------|
| Household       | 1                            | 600                                              | 0.5                             | 360                  | 1.32                                                                 | 30                            | 1.545                                           |       |
| Restaurant      | Small and medium-sized (80%) | 2000                                             | 4                               | 360                  | 0.68                                                                 | 30                            | 1.545                                           |       |
|                 | Large-sized (20%)            | 2000                                             | 4                               | 360                  | 0.68                                                                 | 30                            | 1.545                                           |       |
| Canteen         | Middle school                | Student                                          | 6                               | 300                  | 1.32                                                                 | 30                            | 1.545                                           |       |
|                 |                              | Teaching staff                                   | 1.5                             | 300                  | 1.32                                                                 | 30                            | 1.545                                           |       |
|                 | University                   | Student                                          | 6                               | 200                  | 200                                                                  | 1.32                          | 30                                              | 1.545 |
|                 |                              | Teaching staff                                   | 1.5                             | 200                  | 200                                                                  | 1.32                          | 30                                              | 1.545 |
| Unit            | 1                            | 2000                                             | 1.5                             | 240                  | 1.32                                                                 | 30                            | 1.545                                           |       |

<sup>a</sup> Wu et al. (2018) and Ministry. (2001); <sup>b</sup> Wu et al. (2018); <sup>c</sup> Li et al. (2018).

Table S9 Size of swimming pool (Li et al., 2020).

| Size Type  | Public swimming pool   |                                               | Private swimming pool |
|------------|------------------------|-----------------------------------------------|-----------------------|
|            | Standard swimming pool | Semi standard and non-standard swimming pools |                       |
| Length (m) | 50                     | 25                                            | 10                    |
| Width (m)  | 21                     | 21                                            | 8                     |
| Depth (m)  | 1.8                    | 1.8                                           | 1.4                   |

Table S10 Parameters of breeding disinfection (Li et al., 2020).

| Breeding type | Breeding density<br>(m <sup>2</sup> /per) | Disinfectant usage per<br>unit area (g/m <sup>2</sup> ) | Sterilization frequency<br>(times/year) | Chlorine volatilization<br>rate |
|---------------|-------------------------------------------|---------------------------------------------------------|-----------------------------------------|---------------------------------|
| Livestock     | 1.2                                       | 1                                                       | 52                                      | 0.3                             |
| Poultry       | 0.05                                      | 1                                                       | 52                                      | 0.3                             |
| Aquaculture   | -                                         | 0.3                                                     | 18                                      | 0.2                             |

Table S11 Sources of spatial allocation factors

| Sector                            | Sub-sector                    | Thi-sector            | Four-sector                 | Resolution                                                                                               | Space allocation factor                                                                                                                                                                                                                                                                    |                |                                       |
|-----------------------------------|-------------------------------|-----------------------|-----------------------------|----------------------------------------------------------------------------------------------------------|--------------------------------------------------------------------------------------------------------------------------------------------------------------------------------------------------------------------------------------------------------------------------------------------|----------------|---------------------------------------|
| Power                             | Power coal combustion         | Power plant           |                             | Point                                                                                                    | Location of thermal power plants (WRI dataset <a href="https://datasets.wri.org/dataset/globalpowerplantdatabase">https://datasets.wri.org/dataset/globalpowerplantdatabase</a> )                                                                                                          |                |                                       |
|                                   | Industrial coal combustion    | Heat supply           |                             | Point                                                                                                    | Location of heating enterprises ( <a href="http://www.sz-w.com/hyqyml.php">http://www.sz-w.com/hyqyml.php</a> )                                                                                                                                                                            |                |                                       |
| Industry                          | Industrial coal combustion    | Industry              |                             | Area (1km×1km)                                                                                           | Total population data (LandScan 2018)                                                                                                                                                                                                                                                      |                |                                       |
|                                   |                               | Construction industry |                             | Area (1km×1km)                                                                                           | Total population data (LandScan 2018)                                                                                                                                                                                                                                                      |                |                                       |
|                                   | Industrial production process | Cement production     |                             | Point                                                                                                    | Location of cement enterprise ( <a href="http://www.sz-w.com/hyqyml.php">http://www.sz-w.com/hyqyml.php</a> )                                                                                                                                                                              |                |                                       |
|                                   |                               | Iron production       |                             | Point                                                                                                    | Location of metallurgical enterprises ( <a href="http://www.sz-w.com/hyqyml.php">http://www.sz-w.com/hyqyml.php</a> )                                                                                                                                                                      |                |                                       |
|                                   |                               | Steel production      |                             | Point                                                                                                    | Location of metallurgical enterprises ( <a href="http://www.sz-w.com/hyqyml.php">http://www.sz-w.com/hyqyml.php</a> )                                                                                                                                                                      |                |                                       |
|                                   |                               | HCl production        |                             | Point                                                                                                    | Location of chemical enterprises ( <a href="http://www.sz-w.com/hyqyml.php">http://www.sz-w.com/hyqyml.php</a> )                                                                                                                                                                           |                |                                       |
|                                   |                               | Flat glass production |                             | Point                                                                                                    | Location of glass enterprises ( <a href="http://www.sz-w.com/hyqyml.php">http://www.sz-w.com/hyqyml.php</a> )                                                                                                                                                                              |                |                                       |
|                                   |                               | Cooling tower         |                             | Point                                                                                                    | Location of thermal power plants (WRI dataset <a href="https://datasets.wri.org/dataset/globalpowerplantdatabase">https://datasets.wri.org/dataset/globalpowerplantdatabase</a> ) and chemical enterprises ( <a href="http://www.sz-w.com/hyqyml.php">http://www.sz-w.com/hyqyml.php</a> ) |                |                                       |
|                                   |                               | Residential           | Residential coal combustion | Residents                                                                                                |                                                                                                                                                                                                                                                                                            | Area (1km×1km) | Total population data (LandScan 2018) |
|                                   |                               |                       |                             | Traffic                                                                                                  |                                                                                                                                                                                                                                                                                            | Area (1km×1km) | Total population data (LandScan 2018) |
| Residential usage of disinfectant | Business                      |                       |                             | Area (1km×1km)                                                                                           | Total population data (LandScan 2018)                                                                                                                                                                                                                                                      |                |                                       |
|                                   | Other                         |                       |                             | Area (1km×1km)                                                                                           | Total population data (LandScan 2018)                                                                                                                                                                                                                                                      |                |                                       |
|                                   | Water treatment               |                       | Point                       | Location of water plants ( <a href="http://www.sz-w.com/hyqyml.php">http://www.sz-w.com/hyqyml.php</a> ) |                                                                                                                                                                                                                                                                                            |                |                                       |



|             |                            |                        |                       |                                                                                                                                                                   |                                                                                                          |
|-------------|----------------------------|------------------------|-----------------------|-------------------------------------------------------------------------------------------------------------------------------------------------------------------|----------------------------------------------------------------------------------------------------------|
|             |                            | Waste treatment        | Domestic sewage       | Point                                                                                                                                                             | Location of sewage-treatment plants<br>( <a href="https://www.dowater.com">https://www.dowater.com</a> ) |
|             | Swimming pool              | Medical sewage         | Public swimming pool  | Point                                                                                                                                                             | Location of hospitals (Gaode's 2018 POI data)                                                            |
|             |                            |                        | Private swimming pool | Point                                                                                                                                                             | Location of swimming pools (Gaode's 2018 POI data)                                                       |
|             | Environmental disinfection | Hospital               | Area (1km×1km)        | Total population data (LandScan 2018)                                                                                                                             |                                                                                                          |
|             |                            | Toilet-Public toilet   | Point                 | Location of hospitals (Gaode's 2018 POI data)                                                                                                                     |                                                                                                          |
|             |                            | Toilet-Domestic toilet | Point                 | Location of public toilets (Gaode's 2018 POI data)                                                                                                                |                                                                                                          |
|             |                            |                        | Area (1km×1km)        | Total population data (LandScan 2018)                                                                                                                             |                                                                                                          |
|             | Tap water use              | Car washing            | Point                 | Location of car washing stations (Gaode's 2018 POI data)                                                                                                          |                                                                                                          |
|             | Waste incineration station | Lawn watering          | Area (1km×1km)        | Urban population data (LandScan 2018)                                                                                                                             |                                                                                                          |
|             |                            | Road watering          | Area (1km×1km)        | Urban population data (LandScan 2018)                                                                                                                             |                                                                                                          |
|             |                            | Water leakage          | Area (1km×1km)        | Total population data (LandScan 2018)                                                                                                                             |                                                                                                          |
|             |                            |                        | Point                 | Location of waste incineration stations (Information Platform for Municipal Solid Waste Incineration <a href="http://www.waste-cwin.org">www.waste-cwin.org</a> ) |                                                                                                          |
|             | Open burning               |                        | Area (1km×1km)        | Rural population data (LandScan 2018)                                                                                                                             |                                                                                                          |
|             | Household                  |                        | Area (1km×1km)        | Total population data (LandScan 2018)                                                                                                                             |                                                                                                          |
|             | Restaurant                 |                        | Area (1km×1km)        | Total population data (LandScan 2018)                                                                                                                             |                                                                                                          |
|             | Canteen                    | School                 | Area (1km×1km)        | Total population data (LandScan 2018)                                                                                                                             |                                                                                                          |
|             |                            | Unit                   | Area (1km×1km)        | Total population data (LandScan 2018)                                                                                                                             |                                                                                                          |
|             |                            |                        | Area (1km×1km)        | Rural population data (LandScan 2018)                                                                                                                             |                                                                                                          |
| Agriculture |                            | Livestock              | Point                 | Location of poultry breeding bases (Gaode's 2018 POI data)                                                                                                        |                                                                                                          |

|                 |                                    |             |  |  |  |  |                |                                                            |
|-----------------|------------------------------------|-------------|--|--|--|--|----------------|------------------------------------------------------------|
|                 |                                    |             |  |  |  |  | Point          | Location of poultry breeding bases (Gaode's 2018 POI data) |
|                 | Agricultural usage of disinfectant | Poultry     |  |  |  |  | Point          | Location of fisheries (Gaode's 2018 POI data)              |
|                 | Agricultural usage of pesticide    | Aquaculture |  |  |  |  | Area (1km×1km) | Rural population data (LandScan 2018)                      |
|                 |                                    | Insecticide |  |  |  |  | Area (1km×1km) | Rural population data (LandScan 2018)                      |
|                 |                                    | Herbicide   |  |  |  |  | Area (1km×1km) | Rural population data (LandScan 2018)                      |
|                 |                                    | Crop        |  |  |  |  | Area (1km×1km) | Rural population data (LandScan 2018)                      |
|                 |                                    | Firewood    |  |  |  |  | Area (1km×1km) | Rural population data (LandScan 2018)                      |
| Biomass burning | Biomass household burning          |             |  |  |  |  | Area (1km×1km) | Rural population data (LandScan 2018)                      |
|                 | Biomass open burning               |             |  |  |  |  | Area (1km×1km) | Rural population data (LandScan 2018)                      |

Table S12 Monthly allocation factors.

| Source category                 | Sub-category                             | Month |       |       |      |       |       |       |       |       |       |       |       |
|---------------------------------|------------------------------------------|-------|-------|-------|------|-------|-------|-------|-------|-------|-------|-------|-------|
|                                 |                                          | 1     | 2     | 3     | 4    | 5     | 6     | 7     | 8     | 9     | 10    | 11    | 12    |
| Coal combustion                 | Power plant                              | 8.6%  | 7.8%  | 8.2%  | 7.7% | 8.0%  | 8.0%  | 9.2%  | 9.4%  | 7.7%  | 7.4%  | 8.2%  | 9.7%  |
|                                 | Heat supply                              | 25.8% | 23.3% | 12.5% | 0.0% | 0.0%  | 0.0%  | 0.0%  | 0.0%  | 0.0%  | 0.0%  | 12.5% | 25.8% |
|                                 | Industrial process <sup>a</sup>          | 7.1%  | 6.5%  | 7.9%  | 8.2% | 8.1%  | 8.7%  | 8.2%  | 8.2%  | 8.4%  | 8.9%  | 9.2%  | 10.1% |
| Industrial production process   | Residential coal combustion <sup>a</sup> | 9.5%  | 10.1% | 9.6%  | 8.5% | 8.3%  | 7.5%  | 7.7%  | 7.7%  | 7.5%  | 7.8%  | 7.5%  | 8.3%  |
|                                 | Other coal combustion                    | 8.5%  | 7.7%  | 8.5%  | 8.2% | 8.5%  | 8.2%  | 8.5%  | 8.5%  | 8.2%  | 8.5%  | 8.2%  | 8.5%  |
|                                 | Cement production                        | 5.3%  | 4.8%  | 7.0%  | 9.5% | 9.7%  | 9.0%  | 8.8%  | 9.0%  | 9.4%  | 9.9%  | 9.3%  | 8.3%  |
| Waste incineration <sup>b</sup> | Iron production                          | 7.8%  | 7.1%  | 7.9%  | 7.9% | 8.8%  | 8.6%  | 8.9%  | 8.7%  | 8.7%  | 8.9%  | 8.4%  | 8.3%  |
|                                 | Steel production                         | 7.8%  | 7.0%  | 8.0%  | 8.3% | 8.7%  | 8.6%  | 8.8%  | 8.7%  | 8.7%  | 8.9%  | 8.4%  | 8.2%  |
|                                 | HCl production                           | 7.1%  | 6.5%  | 7.9%  | 8.2% | 8.1%  | 8.7%  | 8.2%  | 8.4%  | 8.9%  | 8.7%  | 9.2%  | 10.1% |
| Biomass burning <sup>c</sup>    | Flat glass production                    | 8.0%  | 7.2%  | 8.1%  | 8.3% | 8.4%  | 8.7%  | 8.5%  | 8.5%  | 8.5%  | 8.6%  | 8.4%  | 8.9%  |
|                                 | Waste incineration <sup>b</sup>          | 8.4%  | 8.9%  | 7.5%  | 6.6% | 6.8%  | 8.7%  | 10.1% | 9.7%  | 8.0%  | 8.5%  | 8.3%  | 8.4%  |
|                                 | Biomass burning <sup>c</sup>             | 1.9%  | 4.8%  | 4.1%  | 3.1% | 2.5%  | 11.2% | 14.6% | 4.2%  | 10.0% | 24.7% | 13.9% | 5.0%  |
| Cooking <sup>d</sup>            | Cooling tower                            | 9.2%  | 9.4%  | 8.5%  | 8.5% | 8.5%  | 7.2%  | 6.6%  | 6.6%  | 8.5%  | 8.5%  | 8.5%  | 10.0% |
|                                 | Water treatment <sup>e</sup>             | 8.6%  | 7.8%  | 8.2%  | 7.7% | 8.0%  | 8.0%  | 9.2%  | 9.4%  | 7.7%  | 7.4%  | 8.2%  | 9.7%  |
|                                 | Water treatment <sup>e</sup>             | 7.5%  | 6.9%  | 8.0%  | 8.0% | 8.4%  | 8.3%  | 9.0%  | 9.3%  | 8.8%  | 8.9%  | 8.4%  | 8.5%  |
| Disinfectant                    | Waste water treatment <sup>e</sup>       | 7.5%  | 6.9%  | 8.0%  | 8.0% | 8.4%  | 8.3%  | 9.0%  | 9.3%  | 8.8%  | 8.9%  | 8.4%  | 8.5%  |
|                                 | Swimming pool                            | 3.4%  | 3.1%  | 3.4%  | 3.3% | 10.8% | 18.0% | 18.6% | 18.6% | 10.7% | 3.4%  | 3.3%  | 3.4%  |
|                                 | Environmental disinfection               | 8.5%  | 7.7%  | 8.5%  | 8.2% | 8.5%  | 8.2%  | 8.5%  | 8.5%  | 8.2%  | 8.5%  | 8.2%  | 8.5%  |
| Pesticide                       | Tap water use <sup>e</sup>               | 7.5%  | 6.9%  | 8.0%  | 8.0% | 8.4%  | 8.3%  | 9.0%  | 9.3%  | 8.8%  | 8.9%  | 8.4%  | 8.5%  |
|                                 | Tap water use <sup>e</sup>               | 9.8%  | 8.8%  | 9.9%  | 9.5% | 8.9%  | 8.4%  | 6.9%  | 7.4%  | 6.6%  | 7.3%  | 8.1%  | 8.4%  |
|                                 | Tap water use <sup>e</sup>               | 9.8%  | 8.8%  | 9.9%  | 9.5% | 8.9%  | 8.4%  | 6.9%  | 7.4%  | 6.6%  | 7.3%  | 8.1%  | 8.4%  |

<sup>a</sup> Hong et al. (2020); <sup>b</sup> Wang et al. (2021); <sup>c</sup> Wu (2009); <sup>d</sup> Wu et al. (2018); <sup>e</sup> Wang et al. (2007).

Table S13 Variation coefficient of activity data.

| Source category               |                                           | Distribution type | Variation coefficient | Reference                                               |
|-------------------------------|-------------------------------------------|-------------------|-----------------------|---------------------------------------------------------|
| Coal combustion               | Coal consumption of power plant           | Normal            | 5%                    | Fu et al. (2018); Yi et al. (2021)                      |
|                               | Coal consumption for heat supply          | Normal            | 5%                    | Fu et al. (2018); Yi et al. (2021)                      |
|                               | Coal consumption of industry              | Normal            | 10%                   | Fu et al. (2018); Yi et al. (2021)                      |
|                               | Coal consumption of residents             | Normal            | 20%                   | Fu et al. (2018); Yi et al. (2021)                      |
|                               | Coal consumption of traffic               | Normal            | 30%                   | Fu et al. (2018); Yi et al. (2021)                      |
|                               | Coal consumption of business              | Normal            | 30%                   | Fu et al. (2018); Yi et al. (2021)                      |
|                               | Coal consumption of construction industry | Normal            | 30%                   | Fu et al. (2018); Yi et al. (2021)                      |
|                               | Coal consumption of agriculture           | Normal            | 30%                   | Fu et al. (2018); Yi et al. (2021)                      |
|                               | Coal consumption of other                 | Normal            | 30%                   | Fu et al. (2018); Yi et al. (2021)                      |
| Industrial production process | Production of cement                      | Normal            | 10%                   | Fu et al. (2018); Yi et al. (2021)                      |
|                               | Production of iron                        | Normal            | 10%                   | Yi et al. (2021)                                        |
|                               | Production of steel                       | Normal            | 10%                   | Yi et al. (2021)                                        |
|                               | Production of hydrochloric acid           | Normal            | 20%                   | Fu et al. (2018); Yi et al. (2021)                      |
|                               | Production of flat glass                  | Normal            | 10%                   | Fu et al. (2018); Yi et al. (2021)                      |
| Waste incineration            | Waste incineration amount                 | Normal            | 10%                   | Fu et al. (2018); Yi et al. (2021)                      |
|                               | Open incineration amount of garbage       | Normal            | 30%                   | Fu et al. (2018); Yi et al. (2021)                      |
| Biomass burning               | Biomass combustion                        | Normal            | 30%                   | Fu et al. (2018); Yi et al. (2021)                      |
| Cooking                       | Household                                 | Normal            | 20%                   | Zheng et al. (2022)                                     |
|                               | Restaurant                                | Normal            | 30%                   | Zheng et al. (2022)                                     |
|                               | Canteen                                   | Normal            | 10%                   | Zheng et al. (2022)                                     |
| Cooling tower                 | Supplementary water volume                | Normal            | 30%                   | Yi et al. (2021); Li et al. (2020); Zheng et al. (2022) |
| Water treatment               | Treatment water volume                    | Normal            | 10%                   | Yi et al. (2021)                                        |
| Waste water treatment         | Domestic sewage treatment volume          | Normal            | 10%                   | Yi et al. (2021)                                        |
|                               | medical wastewater treatment volume       | Normal            | 30%                   | Yi et al. (2021)                                        |
| Swimming pool                 | Number of swimming pools                  | Normal            | 30%                   | Li et al. (2020)                                        |
|                               | Volume of pools                           | Normal            | 50%                   | Li et al. (2020)                                        |
| Tap water use                 | Tap water consumption                     | Normal            | 50%                   | Li et al. (2020)                                        |

|                            |                        |        |     |                  |
|----------------------------|------------------------|--------|-----|------------------|
| Environmental disinfection | Disinfectant usage     | Normal | 50% | Li et al. (2020) |
| Pesticide                  | Usage of disinfectants | Normal | 40% | Yi et al. (2021) |

---

Table S14 Variation coefficient of emission factors.

| Parameter                                |                                        | Distribution       | Variation coefficient | Reference                          |                  |
|------------------------------------------|----------------------------------------|--------------------|-----------------------|------------------------------------|------------------|
| Coal combustion                          |                                        |                    |                       |                                    |                  |
| Cl release ratio                         | Pulverized coal boiler                 | Uniform            | 78%, 98.5%            | Fu et al. (2018); Yi et al. (2021) |                  |
|                                          | Stoker furnace                         | Uniform            | 75%, 99%              | Fu et al. (2018); Yi et al. (2021) |                  |
|                                          | Circulating fluidized bed boiler       | Uniform            | 86%, 99.6%            | Fu et al. (2018); Yi et al. (2021) |                  |
|                                          | Traditional stove                      | Normal             | 50%                   | Yi et al. (2021)                   |                  |
|                                          | Strengthen stove                       | Normal             | 50%                   | Yi et al. (2021)                   |                  |
|                                          | Tea bath                               | Normal             | 50%                   | Zheng et al. (2022)                |                  |
| Removal efficiency                       | Wet scrubber                           | Uniform            | 40%, 60%              | Fu et al. (2018); Yi et al. (2021) |                  |
|                                          | FF                                     | Uniform            | 9.5%, 11.3%           | Fu et al. (2018); Yi et al. (2021) |                  |
|                                          | ESP                                    | Uniform            | 0.9%, 12%             | Fu et al. (2018); Yi et al. (2021) |                  |
|                                          | Mechanical dedusting                   | Uniform            | 16.8%, 27.8%          | Fu et al. (2018); Yi et al. (2021) |                  |
|                                          | Wet desulfurization                    | Uniform            | 93%, 99.4%            | Fu et al. (2018); Yi et al. (2021) |                  |
|                                          | Other desulfurization                  | Uniform            | 85%, 94%              | Fu et al. (2018); Yi et al. (2021) |                  |
|                                          | Cl content in coal                     | Cl content in coal | Lognormal             | 50%                                | Fu et al. (2018) |
|                                          | Industrial production process          |                    |                       |                                    |                  |
| HCl emission factor                      | Cement production                      | Lognormal          | 10%                   | Yi et al. (2021)                   |                  |
|                                          | Iron production                        | Lognormal          | 50%                   | Fu et al. (2018); Yi et al. (2021) |                  |
|                                          | Steel production                       | Lognormal          | 50%                   | Fu et al. (2018); Yi et al. (2021) |                  |
|                                          | HCl production                         | Lognormal          | 30%                   | Yi et al. (2021)                   |                  |
| PM <sub>2.5</sub> emission factor        | Cement production                      | Lognormal          | 50%                   | Zheng et al. (2022)                |                  |
|                                          | Iron production                        | Lognormal          | 50%                   | Zheng et al. (2022)                |                  |
|                                          | Steel production                       | Lognormal          | 50%                   | Zheng et al. (2022)                |                  |
|                                          | Flat glass production                  | Lognormal          | 50%                   | Zheng et al. (2022)                |                  |
| Fine particle Cl <sup>-</sup> percentage | Cement production                      | Uniform            | 0.3%, 1.92%           | Yi et al. (2021)                   |                  |
|                                          | Iron production                        | Uniform            | 0.74%, 8.37%          | Yi et al. (2021)                   |                  |
|                                          | Steel production                       | Uniform            | 0.74%, 8.37%          | Yi et al. (2021)                   |                  |
|                                          | Flat glass production                  | Lognormal          | 50%                   | Zheng et al. (2022)                |                  |
| Flat glass production                    | Reference air displacement             | Lognormal          | 50%                   | Zheng et al. (2022)                |                  |
|                                          | HCl emission concentration             | Lognormal          | 50%                   | Zheng et al. (2022)                |                  |
|                                          | Cl <sub>2</sub> emission concentration | Lognormal          | 50%                   | Zheng et al. (2022)                |                  |
| Waste incineration                       |                                        |                    |                       |                                    |                  |
| HCl emission factor                      | Incineration station                   | Lognormal          | 50%                   | Zheng et al. (2022)                |                  |
|                                          | Open burning                           | Lognormal          | 50%                   | Fu et al. (2018)                   |                  |

|                                          |                      |           |                |                                                         |
|------------------------------------------|----------------------|-----------|----------------|---------------------------------------------------------|
| PM <sub>2.5</sub> emission factor        | Incineration station | Lognormal | 50%            | Zheng et al. (2022)                                     |
|                                          | Open burning         | Lognormal | 50%            | Zheng et al. (2022)                                     |
| Fine particle Cl <sup>-</sup> percentage | Incineration station | Lognormal | 50%            | Fu et al. (2018)                                        |
|                                          | Open burning         | Lognormal | 50%            | Fu et al. (2018)                                        |
| <b>Biomass burning</b>                   |                      |           |                |                                                         |
| HCl emission factor                      | Rice straw (g/kg)    | Uniform   | 0.0393, 0.8065 | Yi et al. (2021)                                        |
|                                          | Wheat straw (g/kg)   | Uniform   | 0.0201, 1.0034 | Yi et al. (2021)                                        |
|                                          | Other crop straw     | Lognormal | 50%            | Yi et al. (2021)                                        |
|                                          | Firewood (g/kg)      | Uniform   | 0.0376, 0.087  | Yi et al. (2021)                                        |
| Cl <sup>-</sup> emission factor          | Rice straw (g/kg)    | Uniform   | 0.187, 0.83    | Yi et al. (2021)                                        |
|                                          | Wheat straw (g/kg)   | Uniform   | 0.1317, 0.939  | Yi et al. (2021)                                        |
|                                          | Corn straw (g/kg)    | Uniform   | 0.059, 1.026   | Yi et al. (2021)                                        |
|                                          | Bean straw (g/kg)    | Uniform   | 0.068, 0.361   | Yi et al. (2021)                                        |
|                                          | Rapeseed straw       | Lognormal | 50%            | Yi et al. (2021)                                        |
|                                          | Other straw          | Lognormal | 50%            | Yi et al. (2021)                                        |
|                                          | Firewood (g/kg)      | Uniform   | 0.086, 0.276   | Yi et al. (2021)                                        |
| <b>Cooking</b>                           |                      |           |                |                                                         |
| PM <sub>2.5</sub> emission factor        | Cooking              | Lognormal | 50%            | Zheng et al. (2022)                                     |
| Fine particle Cl <sup>-</sup> percentage | Cooking              | Lognormal | 20%            | Yi et al. (2021)                                        |
| <b>Cooling tower</b>                     |                      |           |                |                                                         |
| Cl <sub>2</sub> /HOCl emission factor    | Cooling tower        | Lognormal | 50%            | Yi et al. (2021)                                        |
| <b>Water treatment</b>                   |                      |           |                |                                                         |
| Cl <sub>2</sub> /HOCl emission factor    | Chlorine dose        | Lognormal | 50%            | Yi et al. (2021); Li et al. (2020)                      |
|                                          | Free chlorine        | Lognormal | 5%             | Yi et al. (2021); Li et al. (2020)                      |
|                                          | Emission factor      | Uniform   | 10%, 30%       | Yi et al. (2021)                                        |
| <b>Waste water treatment</b>             |                      |           |                |                                                         |
| Cl <sub>2</sub> /HOCl emission factor    | Chlorine dose        | Lognormal | 50%            | Yi et al. (2021); Li et al. (2020)                      |
|                                          | Free chlorine        | Lognormal | 30%            | Yi et al. (2021)                                        |
|                                          | Emission factor      | Uniform   | 10%, 30%       | Yi et al. (2021)                                        |
| <b>Swimming pool</b>                     |                      |           |                |                                                         |
| Cl <sub>2</sub> /HOCl emission factor    | Chlorine dose        | Lognormal | 50%            | Li et al. (2020)                                        |
| <b>Tap water use</b>                     |                      |           |                |                                                         |
| Cl <sub>2</sub> /HOCl emission factor    | Free chlorine        | Lognormal | 10%            | Yi et al. (2021)                                        |
|                                          | Emission factor      | Uniform   | 5%, 15%        | Yi et al. (2021); Li et al. (2020); Zheng et al. (2022) |
| <b>Environment disinfectant</b>          |                      |           |                |                                                         |
| Cl <sub>2</sub> /HOCl emission factor    | Emission factor      | Uniform   | 20%, 40%       | Yi et al. (2021); Li et al. (2020)                      |
| <b>Pesticide</b>                         |                      |           |                |                                                         |
| Cl <sub>2</sub> /HOCl emission factor    | Pesticide            | Lognormal | 50%            | Yi et al. (2021); Zheng et al. (2022)                   |

Reference:

- Fu, X., Wang, T., Wang, S. X., Zhang, L., Cai, S. Y., Xing, J., and Hao, J. M.: Anthropogenic Emissions of Hydrogen Chloride and Fine Particulate Chloride in China, *Environ Sci Technol*, 52, 1644-1654, 10.1021/acs.est.7b05030, 2018.
- Hong, Y., Liu, Y., Chen, X., Fan, Q., Chen, C., Chen, X., and Wang, M.: The role of anthropogenic chlorine emission in surface ozone formation during different seasons over eastern China, *Sci. Total Environ.*, 723, 137697, <https://doi.org/10.1016/j.scitotenv.2020.137697>, 2020.
- Li, L., Yin, S., Huang, L., Yi, X., Wang, Y., Zhang, K., Ooi, C. G., and Allen, D. T.: An emission inventory for Cl<sub>2</sub> and HOCl in Shanghai, 2017, *Atmos. Environ.*, 223, 117220, <https://doi.org/10.1016/j.atmosenv.2019.117220>, 2020.
- Li, Q., Wu, A., Gong, D., Wang, B., and Luan, S.: Characteristics of PM<sub>2.5</sub> emitted from cooking emissions: a review, *Environmental Science & Technology (in Chinese)*, 41, 41-50, 10.19672/j.cnki.1003-6504.2018.08.008, 2018.
- Ministry of Ecology and Environment of the People's Republic of China.: Emission Standard of Cooking fume, 2001.
- Ministry of Ecology and Environment of the People's Republic of China: Emission standard of air pollutants for flat glass industry, 2011.
- National Bureau of Statistics of China.: China Health Statistical Yearbook (2008), Peking Union Medical College Press, Beijing, China, 2008.
- National Bureau of Statistics of China.: China Energy Statistical Yearbook (2019), China Statistics Press, Beijing, China, 2019a.
- National Bureau of Statistics of China.: China Industry Statistical Yearbook (2019), China Statistics Press, Beijing, China, 2019b.
- National Bureau of Statistics of China.: China Urban-Rural Construction Statistical Yearbook (2019), China Statistics Press, Beijing, China, 2019c.
- National Bureau of Statistics of China.: China Population & Employment Statistics Yearbook, China Statistics Press, Beijing, China, 2019d.
- National Bureau of Statistics of China.: China Rural Statistical Yearbook (2019), China Statistics Press, Beijing, China, 2019e.
- National Bureau of Statistics of China.: Educational Statistics Yearbook of China, China Statistics Press, Beijing, China, 2019f.
- National Bureau of Statistics of China.: China Statistical Yearbook (2019), China Statistics Press, Beijing, China, 2019g.
- National Bureau of Statistics of China.: China Statistical Yearbook of Environment (2019), China Statistics Press, Beijing, China, 2019h.
- National Bureau of Statistics of China.: China Health Statistical Yearbook (2019), Peking Union Medical College Press, Beijing, China, 2019i.
- Pan, Y., Li, N., Zheng, J., Yin, S., Li, C., Yang, J., Zhong, L., Chen, D., Deng, S., and Wang, S.: Emission inventory and characteristics of anthropogenic air pollutant sources in Guangdong Province, *Acta Scientiae Circumstantiae (in Chinese)*, 35, 2655-2669, 10.13671/j.hjkxxb.2014.1058, 2015.



- Wang, G., Zhang, H., Jia, M., and Cheng, W.: Investigation and Analysis on Relevant Factors of Household Domestic Waste Production, *Urban Management and Science and Technology (in Chinese)*, 22, 30-34, 10.16242/j.cnki.umst.2021.01.011, 2021.
- Wang, S., Qin, W., Liu, Y., and Wei, S.: An Experimental Study on the Disinfection of Swimming Pool Water with Strong Chlorogen, *China Chlor-Alkali (in Chinese)*, 31-33, 2002.
- Wang, X., Zhang, F., Wang, H., Zhu, J., Zhang, C., Cui, Y., and Shu, Y.: Analysis and Research on Emission Concentration of Heavy Metals, Fluorine and Chlorine from Glass Furnaces, *The 18th National Symposium on Sulfur Dioxide, Nitrogen Oxide, Mercury Pollution Prevention and Fine Particulate Matter (PM2.5) Treatment Technology*, Luoyang, China 2014.
- Wang, Y., Wu, X., and Xu, G.: Analysis of change law of water consumption in Guangzhou City, *Water Economics*, 43-45+83, 2007.
- Wen, J., Li, B., Zhang, X., Tian, Y., Huang, B., Zhu, H., and Feng, Y.: PM2.5 Profiles of Typical Industrial Emissions in Yantai City, China, *Research of Environmental Sciences (in Chinese)*, 32, 1333-1339, 10.13198/j.issn.1001-6929.2019.04.06, 2019.
- Wiedinmyer, C., Yokelson, R. J., and Gullett, B. K.: Global Emissions of Trace Gases, Particulate Matter, and Hazardous Air Pollutants from Open Burning of Domestic Waste, *Environ Sci Technol*, 48, 9523-9530, 10.1021/es502250z, 2014.
- Wong, J. P. S., Carslaw, N., Zhao, R., Zhou, S., and Abbatt, J. P. D.: Observations and impacts of bleach washing on indoor chlorine chemistry, *Indoor Air*, 27, 1082-1090, <https://doi.org/10.1111/ina.12402>, 2017.
- Wu, X.: *The Study of Air Pollution Emission Inventory in Yangtze Delta*, Master, Fudan University, 2009.
- Wu, X., Chen, W., Wang, K., Xiu, A., Zhang, S., Zhao, H., and Zhang, X.: PM2.5 and VOCs emission inventories from cooking in Changchun City, *China Environmental Science (in Chinese)*, 38, 2882-2889, 10.19674/j.cnki.issn1000-6923.2018.0303, 2018.
- Yi, X., Yin, S., Tan, X., Huang, L., Wang, Y., Chen, Y., and Li, L.: Preliminary study on the inventory of sources of hydrogen chloride and particulate chlorine in the atmosphere in Shanghai, *Acta Scientiae Circumstantiae (in Chinese)*, 40, 469-478, 10.13671/j.hjkxxb.2019.0376, 2020.
- Yi, X., Yin, S., Huang, L., Li, H., Wang, Y., Wang, Q., Chan, A., Traoré, D., Ooi, M. C. G., Chen, Y., Allen, D. T., and Li, L.: Anthropogenic emissions of atomic chlorine precursors in the Yangtze River Delta region, China, *Sci. Total Environ.*, 771, 144644, <https://doi.org/10.1016/j.scitotenv.2020.144644>, 2021.
- Zheng, J., Huang, Z., Sha, Q., Zhong, Z., and Xu, Y.: *Uncertainty Analysis of Emission Inventory and Chemical Transport Model*, Science Press, Beijing, China 2022.
- Zhou, Y., Xing, X., Lang, J., Chen, D., Cheng, S., Wei, L., Wei, X., and Liu, C.: A comprehensive biomass burning emission inventory with high spatial and temporal resolution in China, *Atmos. Chem. Phys.*, 17, 2839-2864, 10.5194/acp-17-2839-

2017, 2017.
